# Supplementary material for: Light Microclimate-Driven Changes at Transcriptional Level in Photosynthetic Grape Berry Tissues
Source: MDPI journal article supplement (doi:10.3390/plants10091769), 2021-08-25
Supplement: s1 [file s1]

# Light Microclimate-Driven Changes at Transcriptional Level in Photosynthetic Grape Berry Tissues

**Andreia Garrido** <sup>1,2,\*</sup>, **Ric C. H. De Vos** <sup>3</sup>, **Artur Conde** <sup>1,2,†</sup> and **Ana Cunha** <sup>1,2,4,\*†</sup>

<sup>1</sup> Centre of Molecular and Environmental Biology (CBMA), Department of Biology, University of Minho, Campus de Gualtar, 4710-057 Braga, Portugal; arturconde@bio.uminho.pt

<sup>2</sup> Centre for the Research and Technology of Agro-Environmental and Biological Sciences (CITAB), University of Trás-os-Montes e Alto Douro, Quinta de Prados, 5000-801 Vila Real, Portugal

<sup>3</sup> Business Unit Bioscience, Wageningen Plant Research, Wageningen University and Research (Wageningen-UR), PO Box 16, 6700 AA Wageningen, The Netherlands; ric.devos@wur.nl

<sup>4</sup> Centre of Biological Engineering (CEB), University of Minho, Campus de Gualtar, 4710-057 Braga, Portugal

\* Correspondence: andreia Garrido@sapo.pt (A.G.); accunha@bio.uminho.pt (A.C.)

† Equal senior authorship.

## Supplementary Materials

**Table S1.** Forward (F) and reverse (R) primers used for gene expression analysis by real-time PCR. Sequences accession numbers were obtained through Grape Genome Browser 12x or, for the carotenoid metabolism genes, from Plaza 1.0 (April, 2009; [http://bioinformatics.psb.ugent.be/plaza\\_v1/](http://bioinformatics.psb.ugent.be/plaza_v1/)), or Grape Genome Database (<http://genomes.cribi.unipd.it/grape/>) for *VvLAR2* and *VvRubisCO*.

| Gene                            | Accession number (Genoscope) | Primers                            |
|---------------------------------|------------------------------|------------------------------------|
| <i>VvACT1</i> (reference gene)  | GSVIVT01026580001            | F: 5'-GTGCCTGCCATGTATGTTGCC-3'     |
|                                 |                              | R: 5'-GCAAGGTCAAGACGAAGGATA-3'     |
| <i>VvGAPDH</i> (reference gene) | GSVIVT00009717001            | F: 5'-CACGGTCAGTGAAGCATCAT-3'      |
|                                 |                              | R: 5'-CCTTGTCTCAGTGAACACACCAG-3'   |
| <i>VvPAL1</i>                   | GSVIVG01025703001            | F: 5'-CCGAACCGAATCAAGGACTG-3'      |
|                                 |                              | R: 5'-GTTCCAGCCACTGAGACAAT-3'      |
| <i>VvSTS1</i>                   | GSVIVT01010590001            | F: 5'-CGAAGCAACTAGGCATGTGT-3'      |
|                                 |                              | R: 5'-CTCCCAATCCAATCCTTCA-3'       |
| <i>VvCHS1</i>                   | GSVIVT01032968001            | F: 5'-GTCCCAGGGTTGATTTCAA-3'       |
|                                 |                              | R: 5'-TCTCTCCTTCAGACCCAGTT-3'      |
| <i>VvCHS3</i>                   | Lac14-SSH (CX126991)         | F: 5'-TCGCATCACAAATAGCGAAC-3'      |
|                                 |                              | R: 5'-CAGGGAAGCTGCCATGTATT-3'      |
| <i>VvFLS1</i>                   | GSVIVT01008913001            | F: 5'-CAGGGCTTGCAGGTTTTAG-3'       |
|                                 |                              | R: 5'-GGGTCTTCTCCTTGTTACG-3'       |
| <i>VvMYBPA1</i>                 | GSVIVT01010590001            | F: 5'-AGATCAACTGGTTATGCTTGCT-3'    |
|                                 |                              | R: 5'-AACACAAATGTACATCGCACAC-3'    |
| <i>VvDFR</i>                    | GSVIVT01009743001            | F: 5'-GGCTTTCTAGCGAGAGCGTA-3'      |
|                                 |                              | R: 5'-ACTCTCATTTCCGGCACATT-3'      |
| <i>VvANR</i>                    | GSVIVG01035256001            | F: 5'-CAATACCAGTGTCTCTGAGC-3'      |
|                                 |                              | R: 5'-AAACTGAACCCCTCTTCAC-3'       |
| <i>VvLAR1</i>                   | GSVIVT01024419001            | F: 5'-CAGGAGGCTATGGAGAAGATAC-3'    |
|                                 |                              | R: 5'-ACGCTTCTCTGTACATGTTG-3'      |
| <i>VvLAR2</i>                   | VIT_217s0000g04150           | F: 5'-CAAATCGCTTCATTTCCGACCTCCC-3' |
|                                 |                              | R: 5'-GTCATCTTCTTCCACGGTTACACGG-3' |
| <i>VvLDOX</i>                   | GSVIVT01009743001            | F: 5'-ACCTTCATCCTCCACAACAT-3'      |
|                                 |                              | R: 5'-AGTAGAGCCTCCTGGGTCTT-3'      |
| <i>VvChlSyn</i>                 | GSVIVT01011187001            | F: 5'-GCTGAGACTGATGCAAATGAAGCC-3'  |
|                                 |                              | R: 5'-TGCCGAGAAGCTGATTGAAGTTCCG-3' |
| <i>VvRubisCO</i>                | VIT_13s0019g02050            | F: 5'-TTCAAAGCTCTGCGCGCTCTAC-3'    |
|                                 |                              | R: 5'-TCTCTCAACTTGGATGCCATGAGG-3'  |
| <i>VvSPS1</i>                   | GSVIVT01012825001            | F: 5'-GGTTTGCCTATTGTTGCCACCAG-3'   |
|                                 |                              | R: 5'-CAAGAAGGCCATTGTCAAGTACCC-3'  |
| <i>VvSuSy1</i>                  | GSVIVT01015018001            | F: 5'-TGTTAAGGCTCCTGGATTCAATTA-3'  |
|                                 |                              | R: 5'-AGCCAAATCTTGGCAAGCA-3'       |
| <i>VvPSY1</i>                   | VV00G37410                   | F: 5'-TCGATGTGGTGAAGTTTGTGCAG-3'   |
|                                 |                              | R: 5'-TCAGGTGTCATCAGCATTTGTTCCC-3' |
| <i>VvLBCY2</i>                  | VV08G15130                   | F: 5'-AGGCTGGGTGGTTGAGAATTGG-3'    |
|                                 |                              | R: 5'-TCCTCAACGACAAACCGAAGTGG-3'   |
| <i>VvLECY1</i>                  | VV11G01840                   | F: 5'-TGGATGTGGCAGGGATTCTTGG-3'    |
|                                 |                              | R: 5'-TAGCATGGTTGCTCCAGTAGGG-3'    |

|               |            |                                   |
|---------------|------------|-----------------------------------|
| <i>VvLUT1</i> | VV08G10880 | F: 5'-TGCTTGCTAGCAGAGAAGAGGTG-3'  |
|               |            | R: 5'-ACTGCCATTGAGTGCATCAGTTC-3'  |
| <i>VvVDE1</i> | VV00G14320 | F: 5'-GTTGTCTATGGTTGGTGGTTTGGC-3' |
|               |            | R: 5'-ATGCCAGTGGGTCTCCATTTC-3'    |
| <i>VvZEP1</i> | VV07G11310 | F: 5'-AGCGTGCTATTGGTGGAGAGTG-3'   |
|               |            | R: 5'-CCCGATTATGCAGGGTTTGTCTC-3'  |

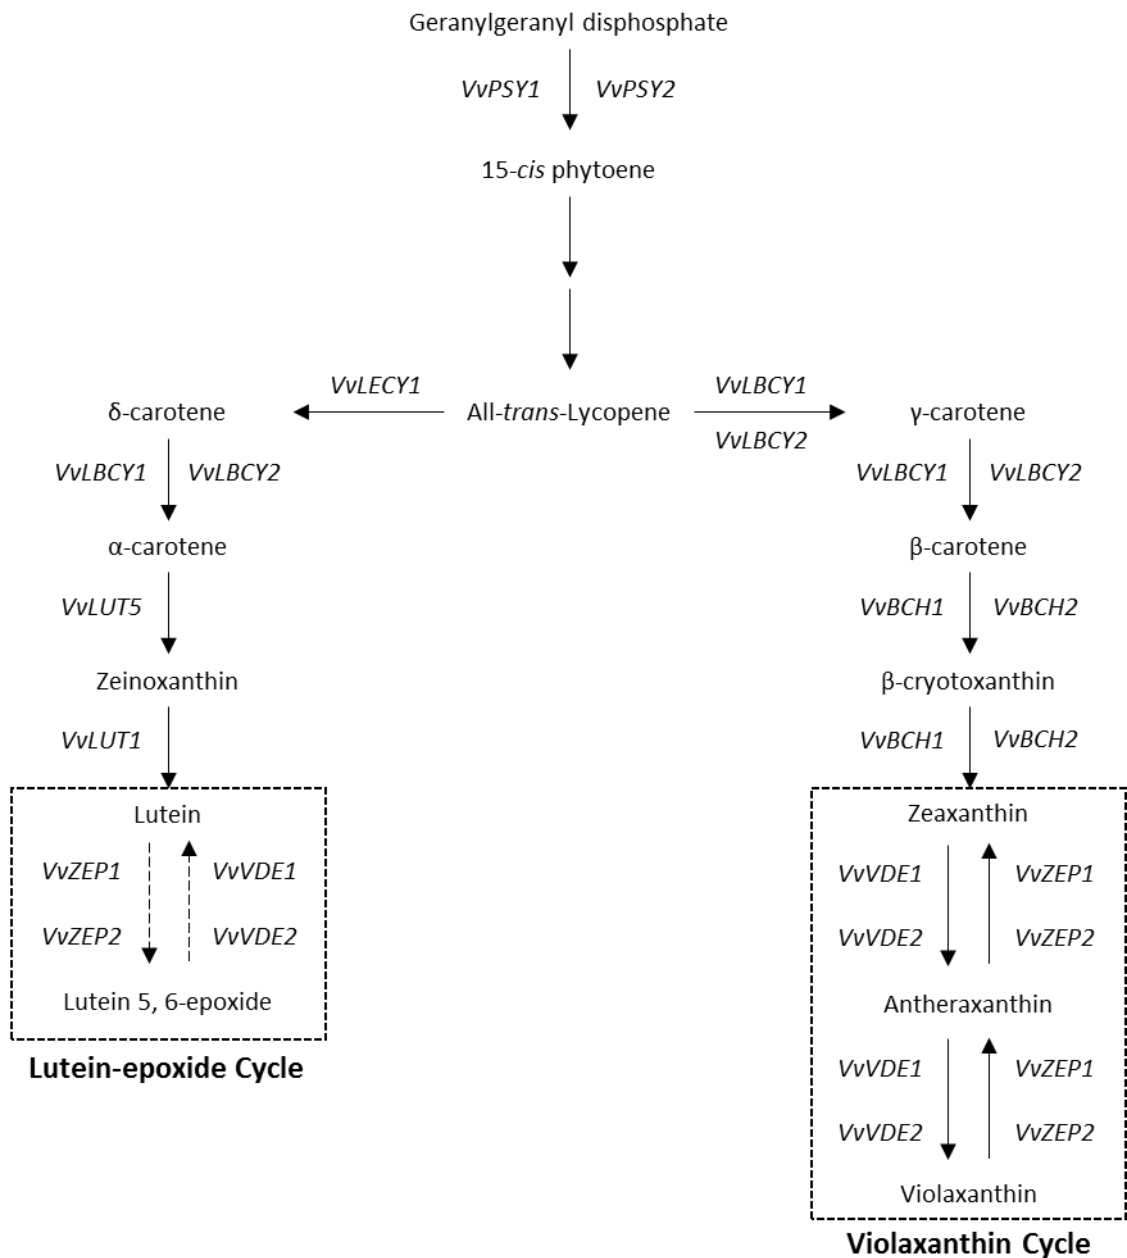

**Figure S1.** Simplified carotenoid metabolic pathway. *PSY1/PSY2*, phytoene synthase; *LEC1/LEC2*, lycopene epsilon cyclase; *LBCY1/LBCY2*, lycopene  $\beta$ -cyclase; *LUT5/LUT1*, lutein synthase; *BCH1/BCH2*,  $\beta$ -carotene hydroxylase; *VDE1/VDE2*, violaxanthin de-epoxidase; *ZEP1/ZEP2*, zeaxanthin epoxidase. Adapted from Young et al. [39].

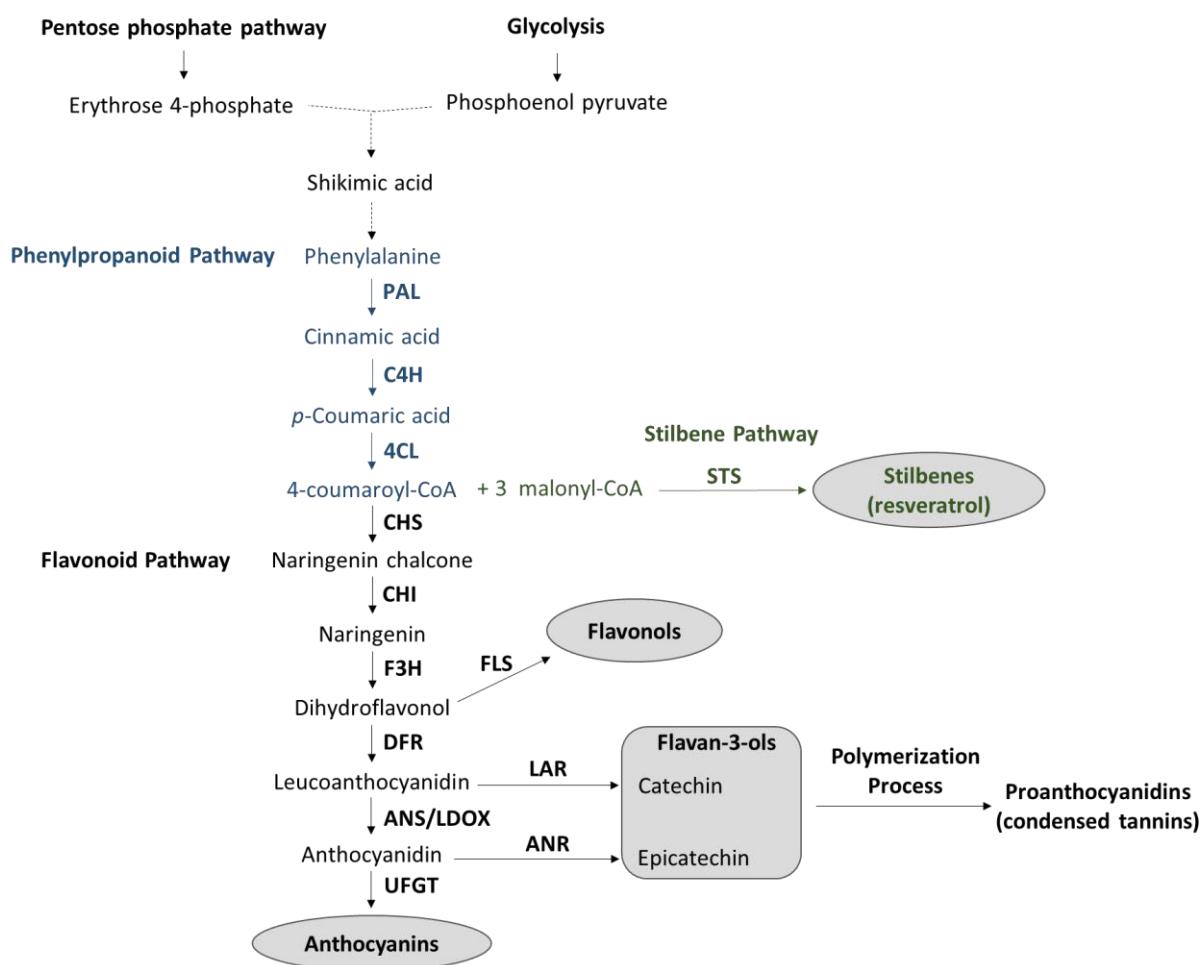

**Figure S2.** Biosynthetic pathways of phenolic compounds in grape berry. PAL, phenylalanine ammonia lyase; C4H, cinnamate-4-hydroxylase; 4CL, 4-coumaroyl:CoA-ligase; CHS, chalcone synthase; STS, stilbene synthase; CHI, chalcone isomerase; F3H, flavonone 3-hydroxylase; FLS, flavonol synthase; DFR, dihydroflavonol reductase; ANS, anthocyanidin synthase; LDOX, leucoanthocyanidin dioxygenase; LAR, leucoanthocyanidin reductase; ANR, anthocyanidin reductase; UFGT, flavonoid glucosyltransferase. Full lines represent direct enzymatic conversion and dashed lines represent omitted intermediates. Adapted from Ageorges et al. [88] and Teixeira et al. [89].

**Table S2.** Matrix with Pearson correlation coefficients ( $r$ ), calculated for selected genes (*VvFLS1*, *VvDFR*, *VvLDOX*, *VvLAR1*, *VvLAR2*, *VvANR* and *VvMYBPA1*) in the exocarp, considering all samples collected in both light microclimate and developmental stages ( $n = 18$ ). The coefficient values in bold are statistically significant ( $p \leq 0.05$ ).

|                 | <i>VvFLS1</i> | <i>VvDFR</i> | <i>VvLDOX</i> | <i>VvLAR1</i> | <i>VvLAR2</i> | <i>VvANR</i> | <i>VvMYBPA1</i> |
|-----------------|---------------|--------------|---------------|---------------|---------------|--------------|-----------------|
| <i>VvFLS1</i>   | 1.000         |              |               |               |               |              |                 |
| <i>VvDFR</i>    | <b>-0.770</b> | 1.000        |               |               |               |              |                 |
| <i>VvLDOX</i>   | -0.419        | -0.104       | 1.000         |               |               |              |                 |
| <i>VvLAR1</i>   | -0.439        | 0.456        | -0.021        | 1.000         |               |              |                 |
| <i>VvLAR2</i>   | -0.452        | <b>0.842</b> | -0.414        | <b>0.567</b>  | 1.000         |              |                 |
| <i>VvANR</i>    | <b>-0.504</b> | <b>0.845</b> | -0.381        | <b>0.567</b>  | <b>0.982</b>  | 1.000        |                 |
| <i>VvMYBPA1</i> | <b>-0.519</b> | <b>0.864</b> | -0.335        | <b>0.557</b>  | <b>0.962</b>  | <b>0.979</b> | 1.000           |

**Table S3.** Matrix with Pearson correlation coefficients ( $r$ ), calculated for selected genes (*VvFLS1*, *VvDFR*, *VvLDOX*, *VvLAR1*, *VvLAR2*, *VvANR* and *VvMYBPA1*) in the seed, considering all samples collected in both light microclimate and developmental stages ( $n = 18$ ). The coefficient values in bold are statistically significant ( $p \leq 0.05$ ).

|                 | <i>VvFLS1</i> | <i>VvDFR</i> | <i>VvLDOX</i> | <i>VvLAR1</i> | <i>VvLAR2</i> | <i>VvANR</i> | <i>VvMYBPA1</i> |
|-----------------|---------------|--------------|---------------|---------------|---------------|--------------|-----------------|
| <i>VvFLS1</i>   | 1.000         |              |               |               |               |              |                 |
| <i>VvDFR</i>    | -0.379        | 1.000        |               |               |               |              |                 |
| <i>VvLDOX</i>   | <b>0.877</b>  | -0.399       | 1.000         |               |               |              |                 |
| <i>VvLAR1</i>   | -0.239        | 0.367        | -0.342        | 1.000         |               |              |                 |
| <i>VvLAR2</i>   | -0.167        | <b>0.752</b> | -0.138        | 0.327         | 1.000         |              |                 |
| <i>VvANR</i>    | <b>0.556</b>  | 0.098        | 0.357         | 0.420         | 0.212         | 1.000        |                 |
| <i>VvMYBPA1</i> | 0.125         | <b>0.698</b> | 0.167         | 0.215         | <b>0.782</b>  | 0.404        | 1.000           |
